# Supplementary material
Source: PubMed Central journal article supplement (PMC5729578)
Supplement: NIHMS923895-supplement-Supplementary.pdf [file NIHMS923895-supplement-Supplementary.pdf]

Supplementary Table 1: Criteria used for frailty operationalization

| Category                                | Criterion or cutoff value*                                  |
|-----------------------------------------|-------------------------------------------------------------|
| <b>Gait Speed</b>                       |                                                             |
| Female, <=159 cm                        | 0.43 m/s                                                    |
| Female, >159 cm                         | 0.50 m/s                                                    |
| Male, <=173 cm                          | 0.50 m/s                                                    |
| Male, >173 cm                           | 0.60 m/s                                                    |
| <b>Grip Strength</b>                    |                                                             |
| Female, Underweight: BMI <=23           | 13.0 kg                                                     |
| Female, Normal: BMI 23 - <=26           | 14.1 kg                                                     |
| Female, Overweight: BMI 26 - <=29       | 14.5 kg                                                     |
| Female, Obese: BMI >= 29                | 14.3 kg                                                     |
| Male, Underweight: BMI <=24             | 21.4 kg                                                     |
| Male, Normal: BMI 24 - <=26             | 23.7 kg                                                     |
| Male, Overweight: BMI 26 - <=28         | 25.5 kg                                                     |
| Male, Obese: BMI >28                    | 24.8 kg                                                     |
| Low Physical Activity                   | Never engage in vigorous activities<br>AND never go walking |
| Exhaustion                              | Self-report low energy<br>OR easily exhausted               |
| Unintentional Weight Loss<br>OR Low BMI | Lost 10 lbs in past year<br>OR BMI<18.5                     |

\*Cut-offs for gait speed and grip strength tests were based on values for the lowest 20% of participants.
